# Supplementary material for: Feasibility and acceptability of early infant screening for sickle cell disease in Lagos, Nigeria—A pilot study
Source: PubMed Central journal article supplement (PMC7714115; doi:10.1371/journal.pone.0242861), 2020-12-03
Supplement: pone.0242861.s003.pdf [file pone.0242861.s003.pdf]

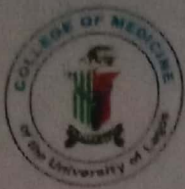

**COLLEGE OF MEDICINE, UNIVERSITY OF LAGOS**  
**HEALTH RESEARCH ETHICS COMMITTEE**

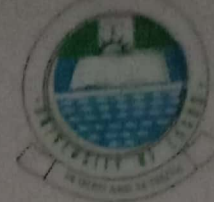

CMUL HREC Registration Number: HREC/15/04/2015

**Office Address:** 2nd Floor, Biomedical Engineering Block,  
College of Medicine, University of Lagos  
P.M.B. 12003, Lagos, Nigeria

**Telephone:** 0802 864 2463 **E-mail:** hrec@cmul.edu.ng **Website:** cmul.unilag.edu.ng

**Chairman:**

Prof. Sunday A. Omilabu  
B.Sc. (Hons.) (Ife), M.Sc. (Ibadan),  
Ph.D. (Ibadan)

**Vice-Chairman:**

Dr. Kolawole S. Oyedeji  
B.Sc. (Uniport), M.Sc. (Ife),  
MHRE (South Africa), Ph.D. (Lagos),  
AIMLS (Nig.), CPHPM (Ilorin)

29<sup>th</sup> April, 2019

**Re:** Feasibility and Acceptability of Early Infant Screening for Sickle Cell Disease In  
Nigeria-A Pilot Study In A Local Government Area In Lagos State.

**CMULHREC Number:** CMUL/HREC/03/19/503

**Name of Principal Investigators:** Dr. Esther Oluwakemi OLUWOLE

**Date of receipt of valid application:** 7<sup>th</sup> March, 2019

**Date of meeting when final determination of research was made:** 20<sup>th</sup> February, 2019

**APPROVAL LETTER**

The above named proposal has been adequately reviewed; the protocol and safety guidelines satisfy the conditions of **CMULHREC** policies regarding experiments involving human and or animal participants.

Therefore, the study under its reviewed state is hereby **approved by the Health Research Ethics committee of College of Medicine of the University of Lagos.**

**PROF. S.A. OMILABU**  
*Name of CMULHREC Chairman*

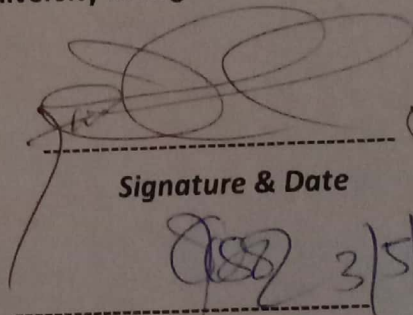  
-----  
**Signature & Date**

03/05/19

**Dr. K. S. Oyedeji**  
*Name of CMULHREC Member*

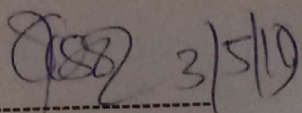  
-----  
**Signature & Date**

3/5/19

This approval is given with the investigator's responsibility declaration as attached and that;

- i) You will submit in CMULHREC prescribed forms, annual progress report during the course of this study, if it is more than one year and final report as the case may be if less than one year and after completion of the study.
- ii) The CMULHREC reserves the right to monitor and review this approval; even after the commencement of your study and inform you of any further changes or amendments that may be required for your compliance.

This approval dates from **29/04/2019 to 28/04/2020**. If there is delay in starting the research, please inform the HREC so that the dates of approval can be adjusted accordingly.
